# Supplementary material for: Real-World Safety and Tolerability of Nintedanib in Patients with Idiopathic Pulmonary Fibrosis: Interim Report of a Post-Marketing Surveillance in Japan
Source: PubMed Central journal article supplement — Adv Ther. 2023 Jan 24;40(4):1474–93. doi: 10.1007/s12325-022-02411-y (PMC10070295; doi:10.1007/s12325-022-02411-y), 2023-01-24
Supplement: 12325_2022_2411_MOESM1_ESM.pdf [file 12325_2022_2411_MOESM1_ESM.pdf]

**Real-World Safety and Tolerability of Nintedanib in Patients with Idiopathic Pulmonary  
Fibrosis: Interim Report of a Japanese Post-Marketing Surveillance Study**

**Supplementary Material**

**Authors:** Takashi Ogura<sup>1</sup>, Yoshikazu Inoue<sup>2</sup>, Arata Azuma<sup>3</sup>, Sakae Homma<sup>4</sup>, Yasuhiro Kondoh<sup>5</sup>,  
Katsumi Tanaka<sup>6</sup>, Kaori Ochiai<sup>7</sup>, Yukihiro Sugiyama<sup>8</sup>, Toshihiro Nukiwa<sup>9</sup>

**Affiliations:** <sup>1</sup>Department of Respiratory Medicine, Kanagawa Cardiovascular and Respiratory Center, Kanagawa, Japan; <sup>2</sup>Clinical Research Center, National Hospital Organization Kinki-Chuo Chest Medical Center, Osaka, Japan; <sup>3</sup>Nippon Medical School Graduate School of Medicine, Tokyo, Japan; <sup>4</sup>Department of Respiratory Medicine, School of Medicine, Toho University, Tokyo, Japan; <sup>5</sup>Department of Respiratory Medicine and Allergy, Tosei General Hospital, Aichi, Japan; <sup>6</sup>Patient Safety and Pharmacovigilance Department, Nippon Boehringer Ingelheim Co., Ltd., Tokyo, Japan; <sup>7</sup>PMS Center, EPS Corporation, Tokyo, Japan; <sup>8</sup>Division of Pulmonary Medicine, Department of Medicine, Nerima Hikarigaoka Hospital, Tokyo, Japan; <sup>9</sup>Department of Respiratory Medicine, Tohoku University, Miyagi, Japan

**Corresponding author:** Takashi Ogura

Email: [takaoguogu@gmail.com](mailto:takaoguogu@gmail.com)

**Supplementary Table S1.** Frequency of acute exacerbation of interstitial pulmonary fibrosis during 12 months of nintedanib treatment

| <b>AE or ADR</b> | <b>Corticosteroid treatment at baseline</b> | <b>Total, N</b> | <b>Patients with acute exacerbation, n (%)</b> | <b>Patients without acute exacerbation, n (%)</b> | <b>OR (95% CI)</b>            |
|------------------|---------------------------------------------|-----------------|------------------------------------------------|---------------------------------------------------|-------------------------------|
| AE               | Yes                                         | 1,329           | 196 (14.7)                                     | 1,133 (85.3)                                      | 3.42 (2.77–4.23) <sup>a</sup> |
|                  | No                                          | 3,845           | 185 (4.8)                                      | 3,660 (95.2)                                      |                               |
| ADR              | Yes                                         | 1,329           | 23 (1.7)                                       | 1,306 (98.3)                                      | 2.80 (1.58–4.98) <sup>a</sup> |
|                  | No                                          | 3,845           | 24 (0.6)                                       | 3,821 (99.4)                                      |                               |

ADR adverse drug reaction, AE adverse event, CI confidence interval, OR odds ratio (Wald method)

<sup>a</sup>Upper 95% CI is <1 or lower 95% CI is >1

**Supplementary Figure S1.** Odds ratio (95% confidence interval) of any adverse event, diarrhoea, hepatic function disorder or infections and infestations according to baseline medication for idiopathic pulmonary fibrosis

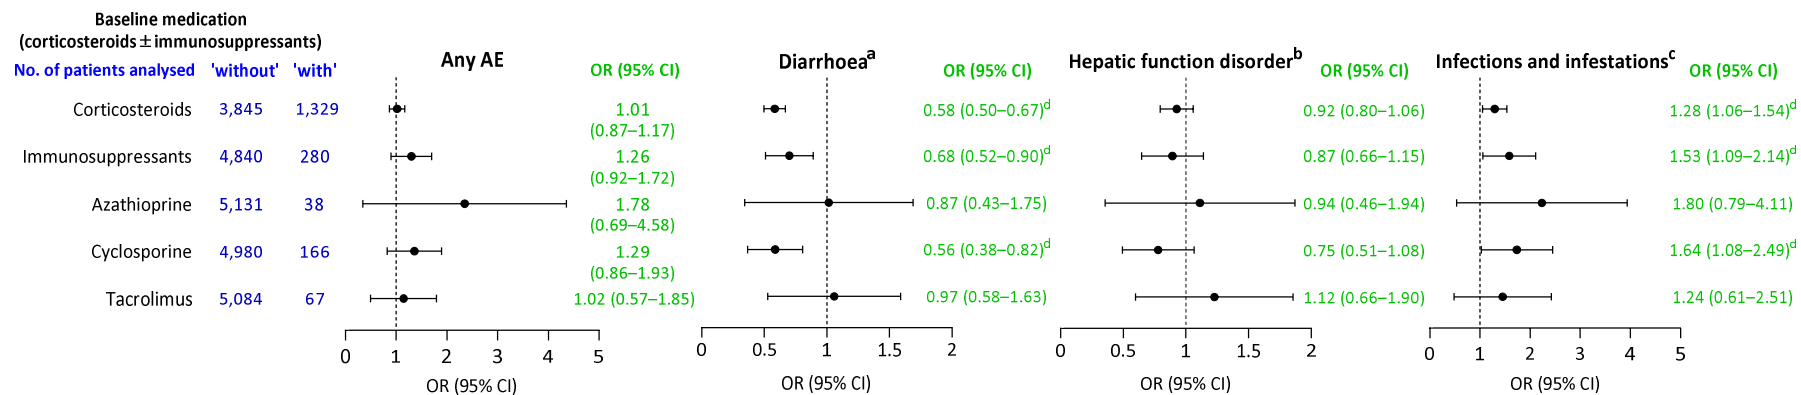

AE adverse event, CI confidence interval, OR odds ratio (Wald method)

<sup>a</sup>Diarrhoea: diarrhoea (preferred term)

<sup>b</sup>Hepatic function disorder: liver-related investigations, signs and symptoms (SMQ: 20000008), cholestasis and jaundice of hepatic origin (sub-SMQ: 20000009), hepatitis, non-infectious (sub-SMQ: 20000010) and hepatic failure, fibrosis and cirrhosis and other liver damage-related conditions (sub-SMQ: 20000013)

<sup>c</sup>Infections and infestations: infections and infestations (system organ class)

<sup>d</sup>Upper 95% CI is <1 or lower 95% CI is >1
